# Supplementary material for: Au–Cu2−xSe heterogeneous nanocrystals for efficient photothermal heating for cancer therapy
Source: Royal Society of Chemistry journal article supplement (doi:10.1039/c7tb01004d), 2017-01-01
Supplement: c7tb01004d1.pdf [file c7tb01004d1.pdf]

## Supporting Information

### Au-Cu<sub>2-x</sub>Se Heterogeneous Nanocrystals for Efficient Photothermal Heating for Cancer Therapy

*Dewei Zhu<sup>a,b</sup>, Maixian Liu<sup>b,c</sup>, Xin Liu<sup>a</sup>, Yang Liu<sup>a,b</sup>, Paras N. Prasad<sup>b,c\*</sup>, Mark T. Swihart<sup>a,b\*</sup>*

---

<sup>a</sup> Department of Chemical and Biological Engineering, <sup>b</sup> Institute for Lasers, Photonics, and Biophotonics, and <sup>c</sup> Department of Chemistry, University at Buffalo, The State University of New York, Buffalo, New York, 14260-4200, USA.

\* Corresponding authors: [swihart@buffalo.edu](mailto:swihart@buffalo.edu) (MTS), [pnprasad@buffalo.edu](mailto:pnprasad@buffalo.edu) (PNP)

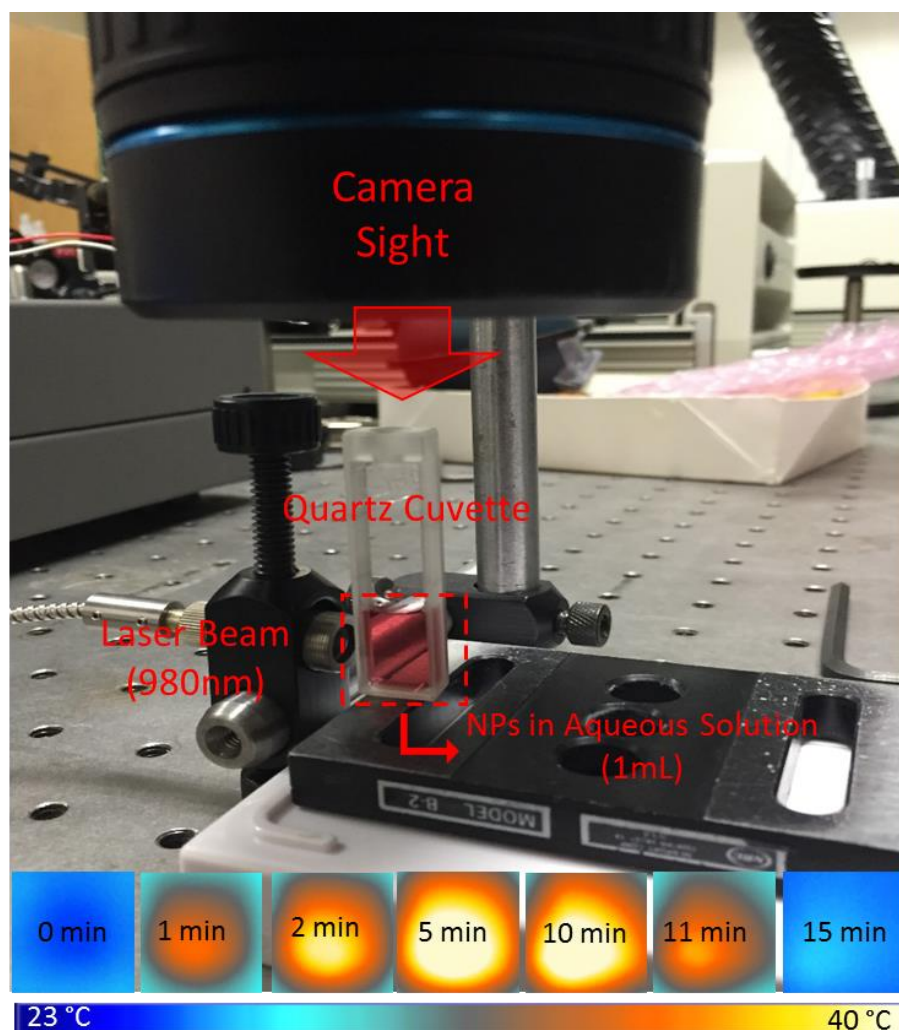

**Fig. S1** Annotated photograph of the system for photo-thermal heating experiments.

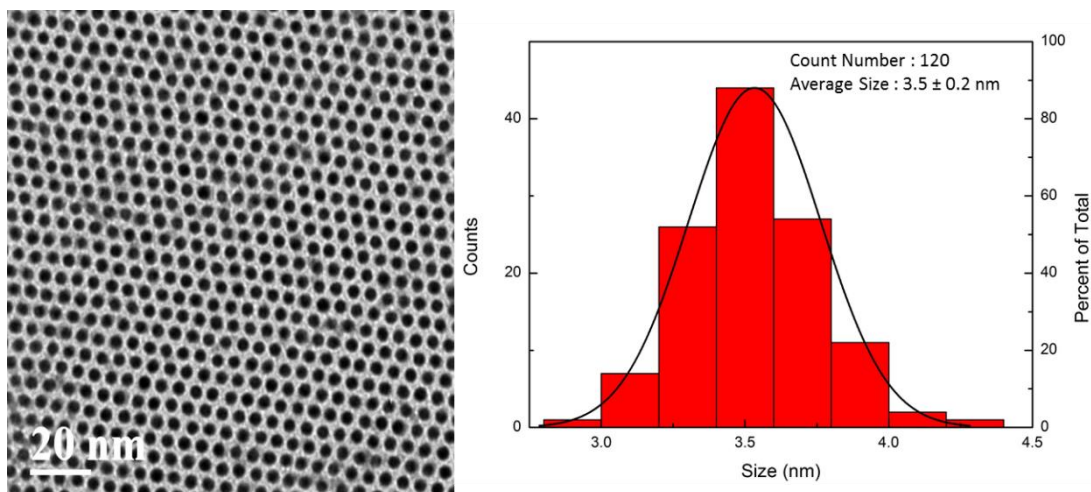

**Fig. S2** TEM images and size distribution of Au Nanoseeds.

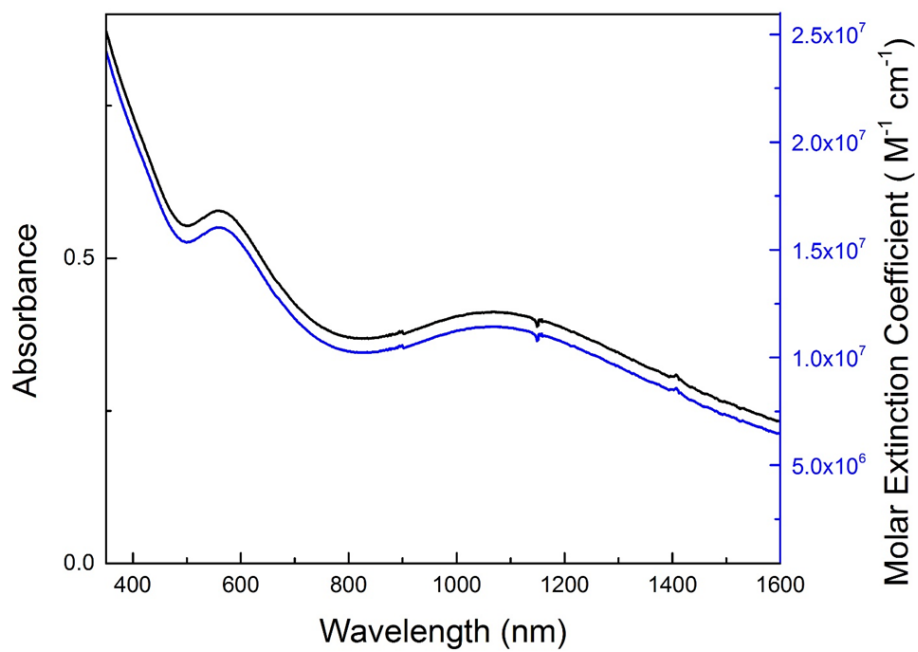

**Fig. S3** Absorbance (black) and molar extinction coefficient (blue) for Au-Cu<sub>2-x</sub>Se NCs in chloroform solution plotted against wavelength.

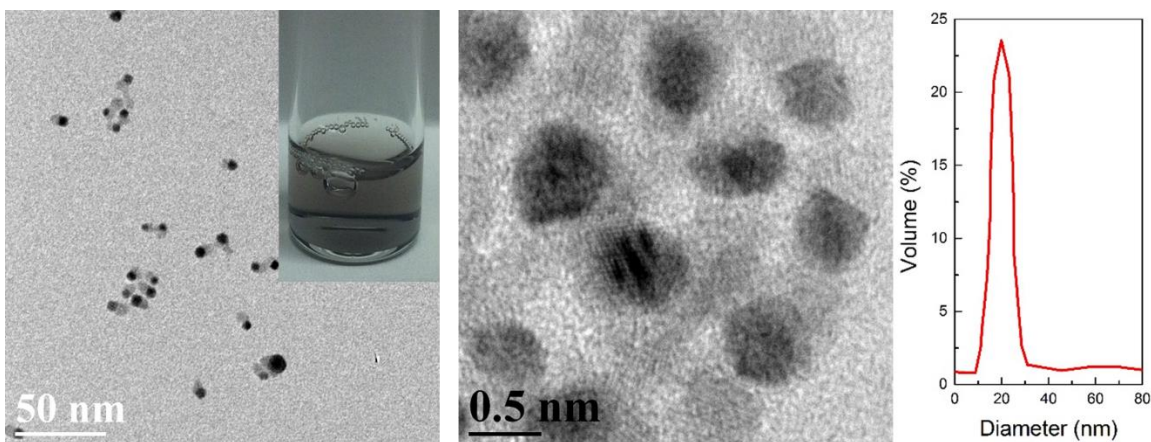

**Fig. S4** TEM and HR TEM of PEGylated Au-Cu<sub>2-x</sub>Se NPs in water and a photograph of the aqueous dispersion. The inset shows results of dynamic light scattering, showing that the hydrodynamic diameter of Au-Cu<sub>2-x</sub>Se NPs is about 20 nm.

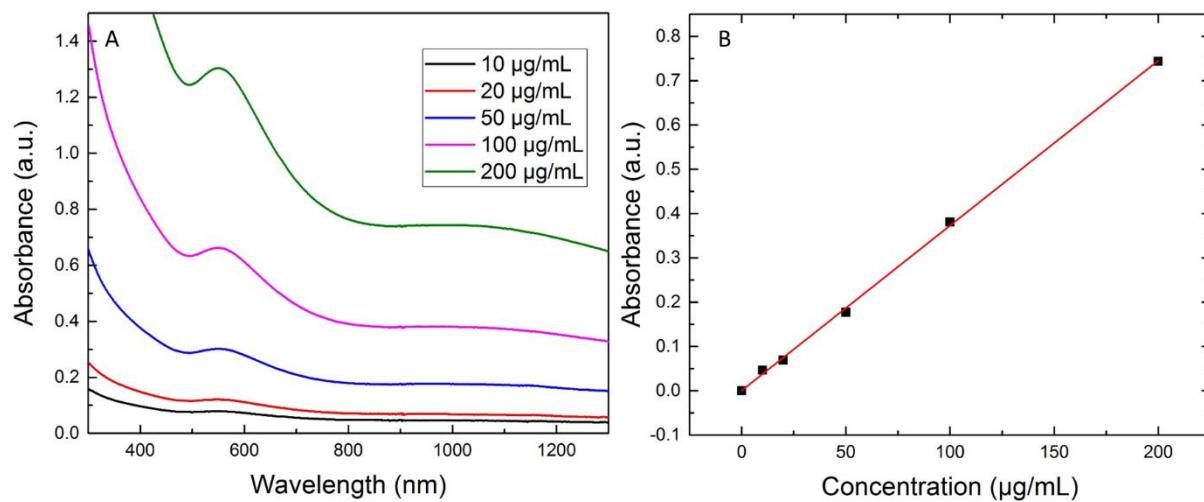

**Fig. S5** (A) Absorbance spectra of PEGylated Au-Cu<sub>2-x</sub>Se nanocrystals dispersed in HPLC water at concentrations of 10, 20, 50, 100 and 200 µg/mL. (B) Plot of absorbance of Au-Cu<sub>2-x</sub>Se NCs dispersions at 980 nm versus concentration, used for obtaining the extinction coefficient.

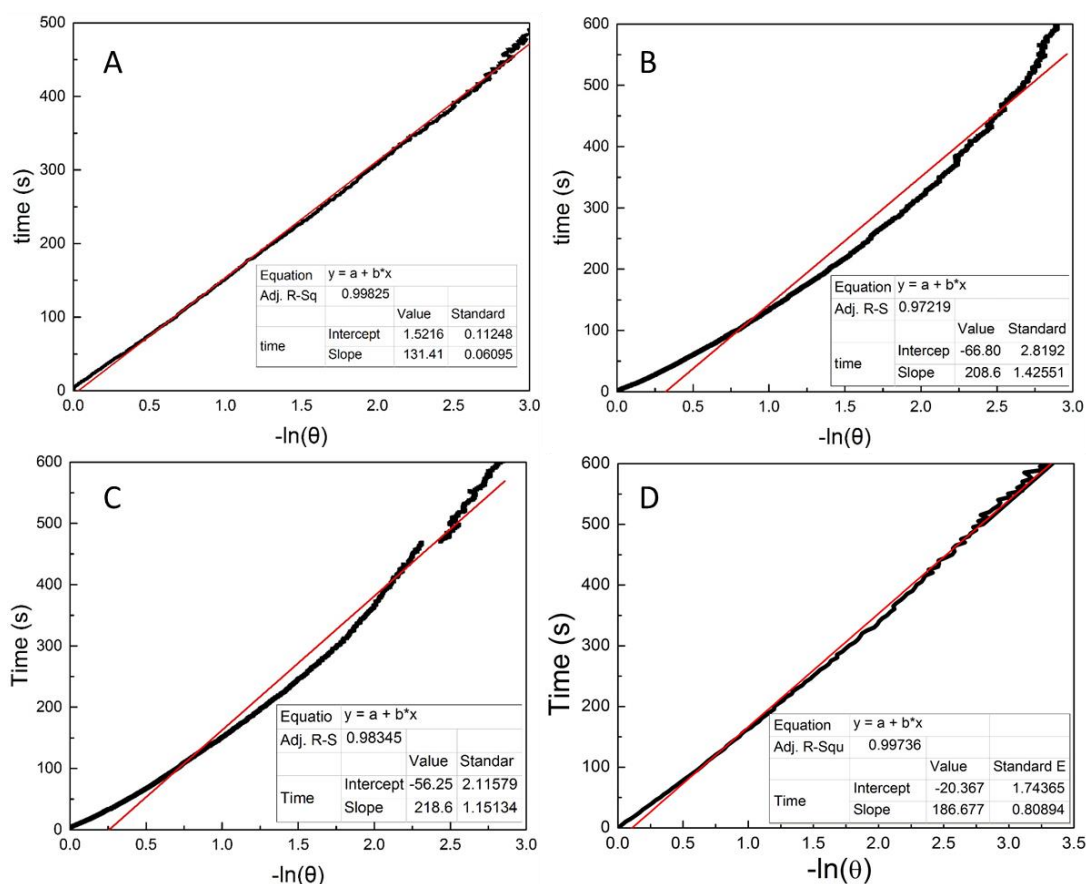

**Fig. S6** Plot of time versus negative natural logarithm of the temperature increment for the cooling cycle (after 10 min heating) for Au-Cu<sub>2-x</sub>Se NCs (A), Au NRs (B), Au NPs (C) and Cu<sub>2-x</sub>Se (D) NPs each at a concentration of 200  $\mu\text{g/mL}$ . The linear fit of the data points results in a half-life time  $\tau_s$  (slope) as shown in the tables shown in the insets.

| Sample                  | Element | Atomic (%) | Weight (%) |
|-------------------------|---------|------------|------------|
| Au-Cu <sub>2-x</sub> Se | Cu      | 56.2       | 41.3       |
|                         | Se      | 29.9       | 27.2       |
|                         | Au      | 14.0       | 31.5       |

**Table S1** EDS analysis of Au, Cu, and Se composition in the heterogeneous nanoparticles (analysis excludes C and O).

## Calculation of molar extinction coefficient

To compare the NIR photoabsorption capability of the Au-Cu<sub>2-x</sub>Se NCs with that of previously reported photothermal agents, such as gold nanorods and nanoshells, the extinction coefficient  $\varepsilon(\lambda)$  of the Au-Cu<sub>2-x</sub>Se NCs, dispersed in chloroform, was calculated according to eq.1<sup>1</sup>

$$A(\lambda) = \varepsilon(\lambda)LC \quad (1)$$

where  $A(\lambda)$  is the absorbance at a wavelength  $\lambda$ ,  $\varepsilon(\lambda)$  is the molar extinction coefficient at a wavelength  $\lambda$ ,  $L$  is the path length (1 cm),  $C$  (M) is the molar concentration of the nanocrystals. The molar concentration of the Au-Cu<sub>2-x</sub>Se NCs is calculated by eq. 2

$$C = \frac{\text{Mass ratio of Au in Au-Cu}_{2-x}\text{Se NCs} \times C_{wt}}{\frac{\text{Volume of Au nanoseeds}}{\text{Volume of Au unit cell}} \times M_{Au} \times \text{Atom number of Au in unit cell}} \quad (2)$$

$$\text{Volume of Au nanoseeds} = \frac{1}{6}\pi d^3 \quad (3)$$

$$\text{Volume of Au unit cell} = abc \quad (4)$$

where the mass ratio of Au in Au-Cu<sub>2-x</sub>Se NCs is determined from EDS analysis as 31.5%,  $C_{wt}$  is the mass concentration of the Au-Cu<sub>2-x</sub>Se NC dispersion, the volume of Au nanoseeds is calculated by eq. 3,  $d$  is the diameter of gold nanoseeds (3.5 nm), the volume of the Au unit cell is calculated by eq. 4,  $a=b=c=0.407$  nm,  $M_{Au}$  is the molar mass of gold (197 g/mol), and the FCC unit cell of gold contains 4 Au atoms. The calculation showed that the molar extinction coefficient of Au-Cu<sub>2-x</sub>Se NCs in chloroform was  $1.1 \times 10^7 \text{ M}^{-1} \text{ cm}^{-1}$  at 980 nm. For the Au nanorods ( $r = 10$  nm,  $L = 75$  nm) and nanoparticles ( $d = 10$  nm), the mass ratio of Au is 1. The volume of Au NRs is  $\pi r^2 L$  and the volume of Au NPs is  $\pi d^3/6$ .

Reference:

1. Zhao, Y.; Pan, H.; Lou, Y.; Qiu, X.; Zhu, J.; Burda, C. J. Am. Chem. Soc. 2009, 131, 4253–4261.
